# Supplementary material for: Variation in Phenolic Compounds and Antioxidant Activity of Various Organs of African Cabbage (Cleome gynandra L.) Accessions at Different Growth Stages
Source: MDPI journal article supplement (doi:10.3390/antiox10121952), 2021-12-06
Supplement: s1 [file s1]

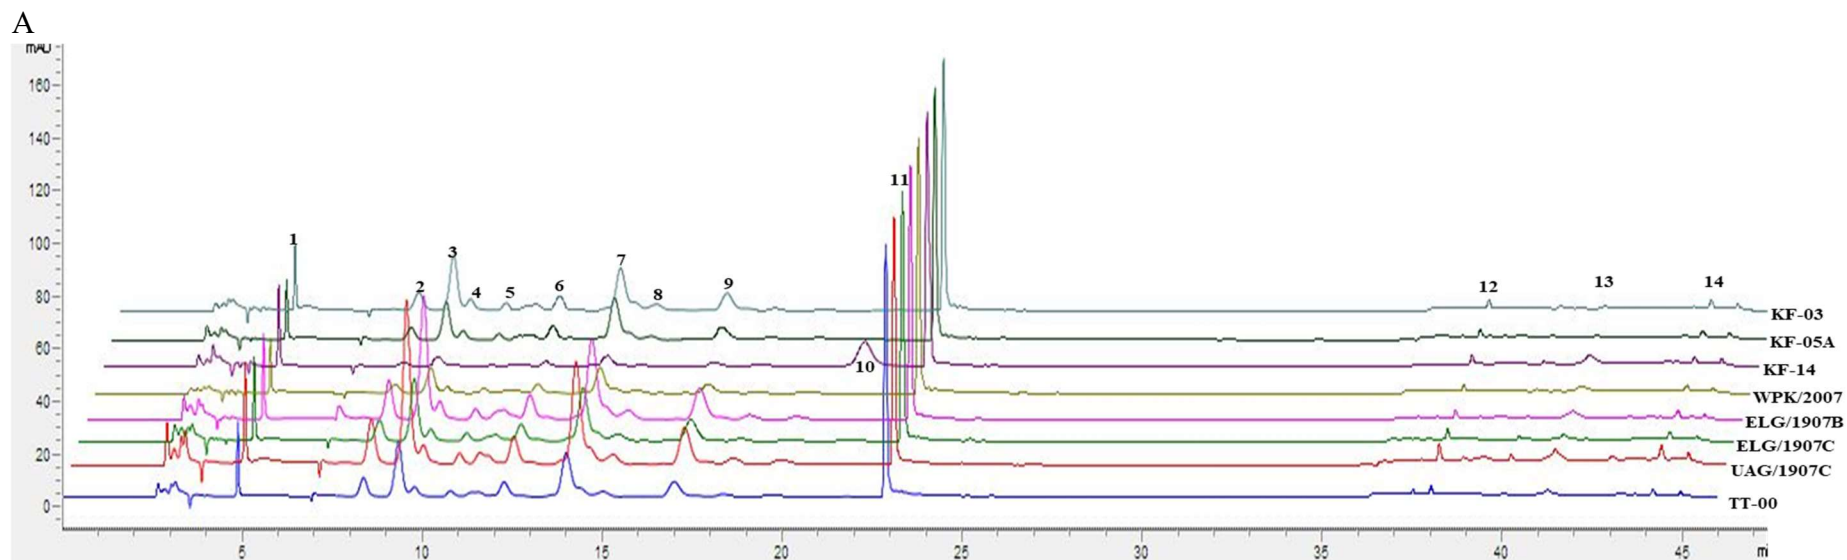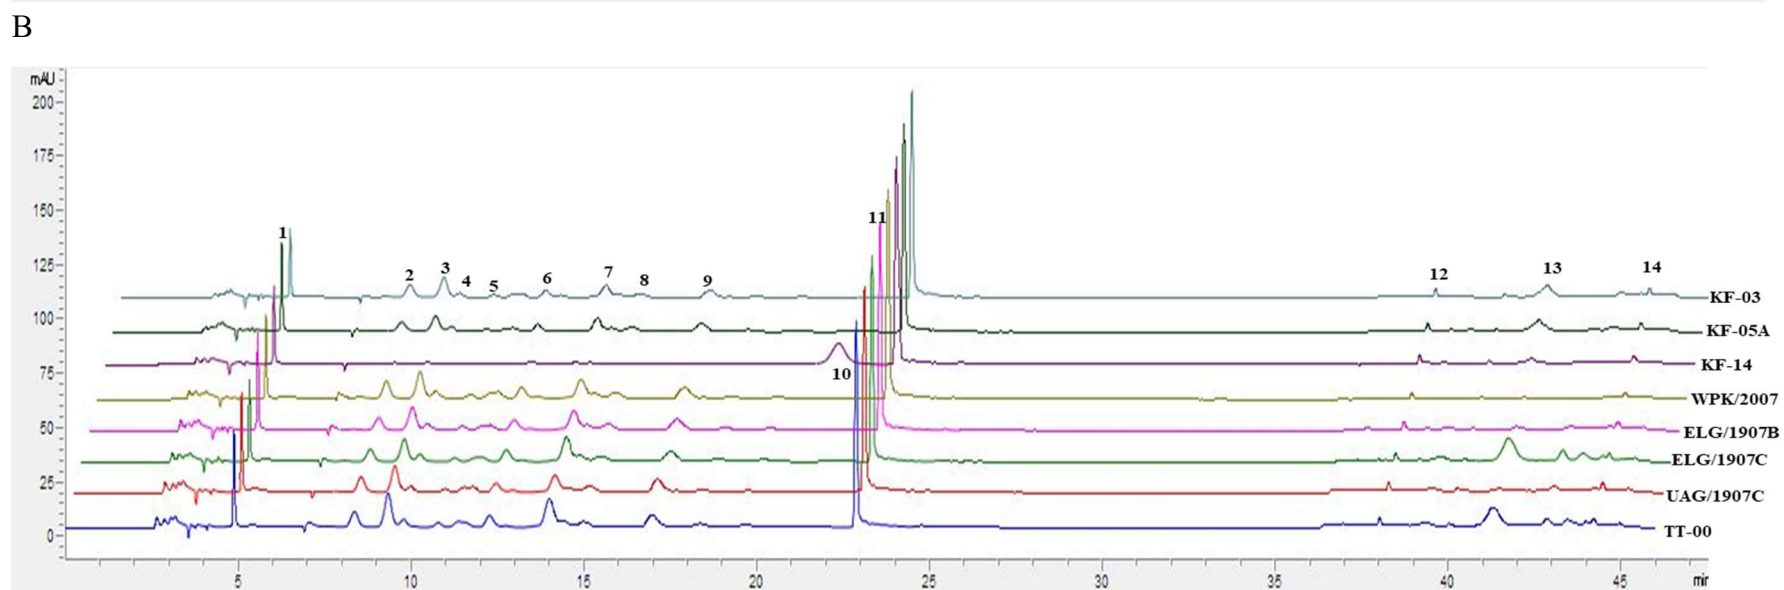

**C**

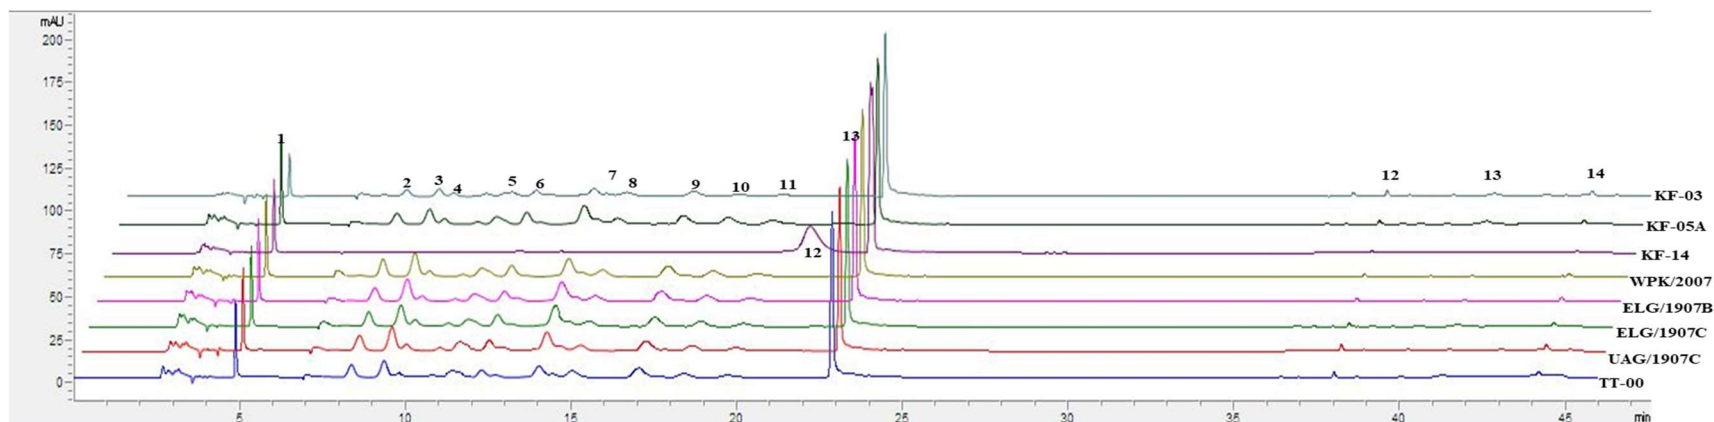

**Supplementary Figure S1.** LS (leaves and stem) organ extract chromatograms obtained at the vegetative (A), flowering (B), and seed set stages (C). Except for KF-14, which lacks some compounds (2-11) and has an extra compound (12) on its profile, the accessions show a similar pattern of phenolic compound profiles.

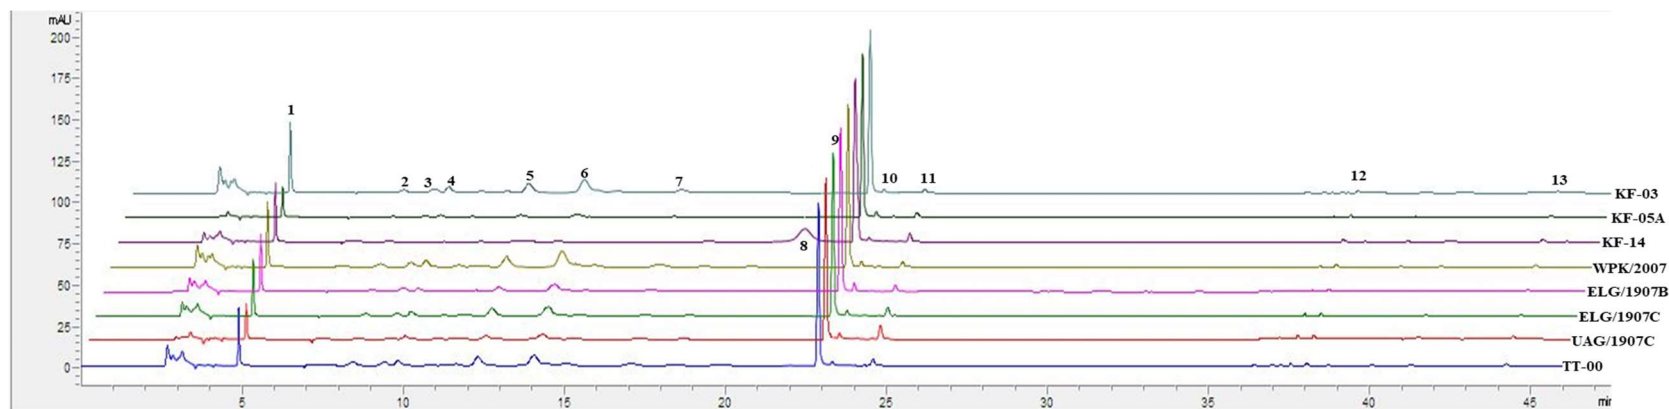

**Supplementary Figure S2.** The chromatograms of flower extracts revealed some differences in the compounds identified compared to the LS extracts. Except for KF-14, which has an extra compound 8 on its profile, the phenolic compound profiles of the accessions follow a similar pattern.

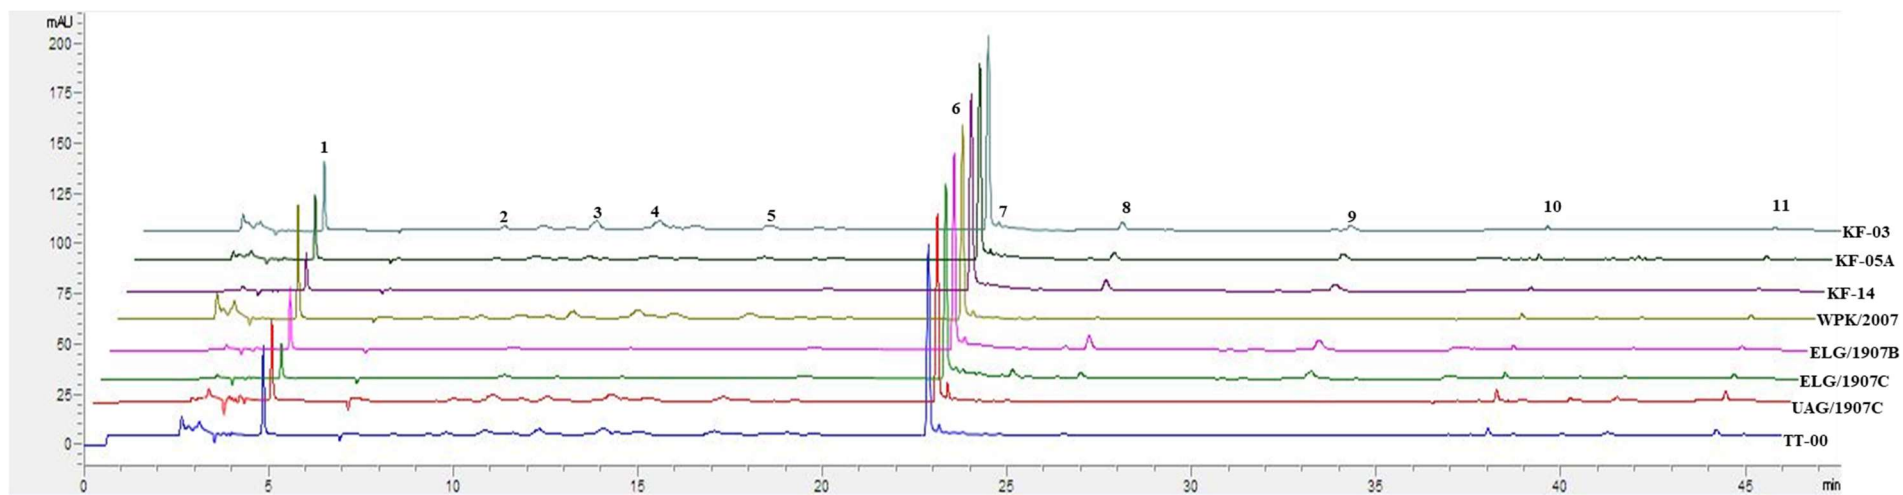

**Supplementary Figure S3:** The chromatogram of siliques extracts show different compound profiles compared to both LS and FF extracts. Siliques of accessions UAG/1907C lack compound 8 and 9 while those of TT-00 and WPK/2007 lack compound 9.

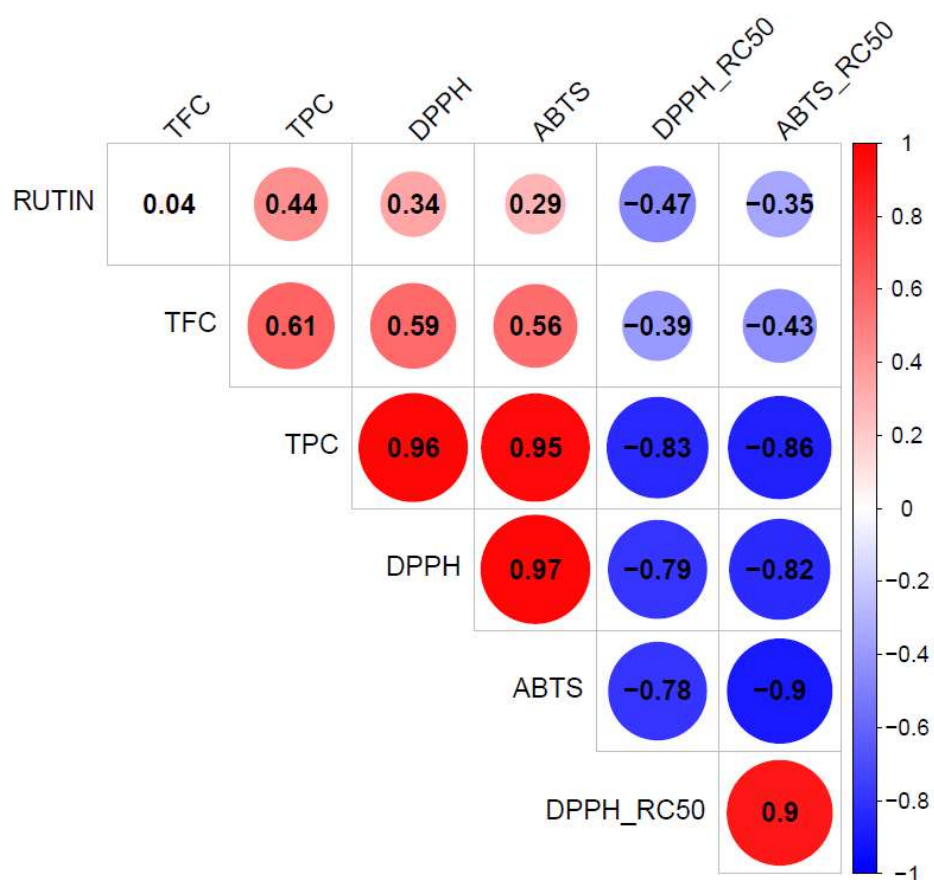

**Supplementary Figure S4:** Correlation matrix plot showing Pearson's correlation coefficient ( $r^2$ ) among the variables (phytochemicals, antioxidant activity and extracts ability to scavenge free radicals). A strong positive correlation was found between the TPC, TFC and the DPPH and ABTS activities while rutin moderately contributed to the antioxidant activity. ABTS = 2,2'-Azinobis-(3-Ethylbenzthiazolin-6-Sulfonic Acid), DPPH = 2,2-diphenyl-1-picrylhydrazyl, TPC = total phenolic contents, TFC = total flavonoid contents,  $RC_{50}$  = dose required to scavenge fifty percent of radicals.
